# Supplementary material
Source: PubMed Central journal article supplement (PMC3519987)

mcHHRz

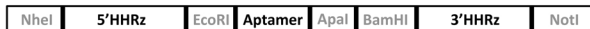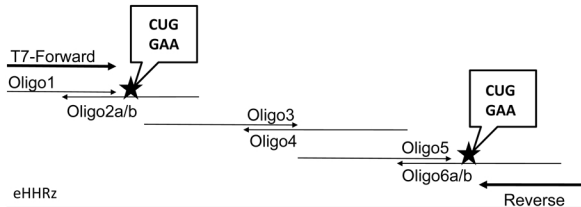

eHHRz

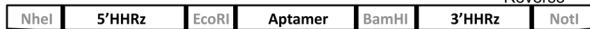

+1

5'-TAGACAATTCAGTCTACTGGCTTATCGAAATTAATACGACTCACTATAGGGAGACCCAA CTCCCACTGTCCTTTCCTAATAAAAA-3'

pA Signal

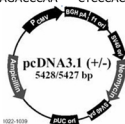

Supplement: mt2012158x1.pdf [file mt2012158x1.pdf]
