# Supplementary material
Source: PubMed Central journal article supplement (PMC3519987)
Supplement: mt2012158x6.pdf [file mt2012158x6.pdf]

**Table S1.** Full length aptamer and extended hammerhead ribozyme sequences cloned into aptamer expression cassettes.

|                                           | Aptamer 5'Constant Region <sup>a</sup>                                                                                                                                            | Sequence                                                                                                                                                          | Aptamer 3'Constant Region <sup>a</sup>       |
|-------------------------------------------|-----------------------------------------------------------------------------------------------------------------------------------------------------------------------------------|-------------------------------------------------------------------------------------------------------------------------------------------------------------------|----------------------------------------------|
| 70.03 <sup>b,c</sup>                      | <b>GAATTC</b> gggaaaagcgaatcatacacaaga                                                                                                                                            | AGATGAATCACAGCCGCTCAACGAGAT <b><u>TGCGAAGG</u></b> AAAA <b><u>ACG</u></b><br><b><u>GGATAACC</u></b> AAUAGATGGAACGAAGACC                                           | gggcataaggtatttaattccata <b>GGATCC</b>       |
| 70.05 <sup>b,c</sup>                      | <b>GAATTC</b> gggaaaagcgaatcatacacaaga                                                                                                                                            | <b><u>TCCGAGGCAGAACGGG</u></b> AAAAT <b><u>CTGCG</u></b> GAAGTAACTGTGGAA<br>TCCGTGACCTTTGACGTGAAAACCGCGA                                                          | gggcataaggtatttaattccata <b>GGATCC</b>       |
| 70.08 <sup>b,c</sup>                      | <b>GAATTC</b> gggaaaagcgaatcatacacaaga                                                                                                                                            | CGAGACAAGTACCGAAAAAGAGAT <b><u>TCTGGCAGTGT</u></b> ACAAC<br><b><u>CAG</u></b> AAAA <b><u>GACAC</u></b> GACGAACACGCCGCAC                                           | gggcataaggtatttaattccata <b>GGATCC</b>       |
| 70.15 <sup>b,c</sup>                      | <b>GAATTC</b> gggaaaagcgaatcatacacaaga                                                                                                                                            | TCACCTGAAAGACGCAGACCTACGA <b><u>ACCCAGGAGATAAGG</u></b><br><b><u>GGG</u></b> AAAA <b><u>CTCT</u></b> GGAAAACCAACCGGTAGTC                                          | gggcataaggtatttaattccata <b>GGATCC</b>       |
| 70.26 <sup>b,c</sup>                      | <b>GAATTC</b> gggaaaagcgaatcatacacaaga                                                                                                                                            | TGCTAAACCAAGTAAGAAT <b><u>TCCGTGAAGT</u></b> CACAGCAC <b><u>CGGGA</u></b><br>TAA <b><u>ACT</u></b> GTGTCAAACGCCATAGCT                                             | gggcataaggtatttaattccata <b>GGATCC</b>       |
| 80.77 <sup>b,c</sup>                      | <b>GAATTC</b> gggcataaggtatttaattccata                                                                                                                                            | CTCACGCT <b><u>TGACAAC</u></b> CACA <b><u>GGGGA</u></b> CAGAGCTAA <b><u>GTTGTT</u></b><br><b><u>A</u></b> TCCCTTNGCAACACCGACATTGCCGAGCGATGGTTATCA                 | ttgattcggatgctccggtagctcaacctg <b>GGATCC</b> |
| 80.80 <sup>b,c</sup>                      | <b>GAATTC</b> gggcataaggtatttaattccata                                                                                                                                            | UGCAGTTGTACAAT <b><u>TCCG</u></b> TTTT <b><u>CTGTGTT</u></b> <b><u>CGGG</u></b> ACAAA <b><u>ACA</u></b><br><b><u>CAG</u></b> CAACATAGTAGCTATCGCTCAACCGGACATGCAAGA | ttgattcggatgctccggtagctcaacctg <b>GGATCC</b> |
| Arbitrary<br>Luc<br>Fragment <sup>c</sup> | <b>GAATTC</b> gggaaaagcgaatcatacacaaga                                                                                                                                            | AATTTGGACTTTCGCCCTTCTTGGCCTTTATGAGGATCTCT<br>CTGATTTTTCTTGCCTCGAGTTTTCCGG                                                                                         | gggcataaggtatttaattccata                     |
| 5'Active<br>HHRz <sup>c,d</sup>           | N/A                                                                                                                                                                               | <b>GCTAGCGGATTAACAAG<b><i>CT</i></b></b> GATGAGTCGCTGGGATGCGA<br>CGAAACGCCTTCGGGCGTCCTTGTATCT <b><i>GAATTC</i></b>                                                | N/A                                          |
| 5'Inactive<br>HHRz <sup>c,d</sup>         | N/A                                                                                                                                                                               | GCTAGCGGATTAACAAG <b><i>GAA</i></b> TGAGTCGCTGGGATGCGA<br>CGAAACGCCTTCGGGCGTCCTTGTATCT <b><i>GAATTC</i></b>                                                       | N/A                                          |
| 3'Active<br>HHRz <sup>c,d</sup>           | N/A                                                                                                                                                                               | <b>GGATCCT</b> GTACGGATTGTGCTTATCCGT <b><i>CT</i></b> GATGAGTCCG<br>TGAGGACGAAACAG <b><i>CGGCCG</i></b>                                                           | N/A                                          |
| 3'Inactive<br>HHRz <sup>c,d</sup>         | N/A                                                                                                                                                                               | <b>GGATCCT</b> GTACGGATTGTGCTTATCCGT <b><i>GAA</i></b> TGAGTCCG<br>TGAGGACGAAACAG <b><i>CGGCCG</i></b>                                                            | N/A                                          |
| Empty<br>Cassette <sup>e</sup>            | <b>GCTAGCGGATTAACAAG<b><i>CT</i></b></b> GATGAGTCGCTGGGATGCGACGAAACGCCTTCGGGCGTCCTTGTATCT <b><i>GAATTC</i></b> <b><i>CT</i></b> GAT<br>GAGTCCGTGAGGACGAAACAG <b><i>CGGCCG</i></b> |                                                                                                                                                                   |                                              |

<sup>a</sup>Lower case nucleotide regions were held constant during the original replicative selection

<sup>b</sup>Pseudoknot structures are indicated by bolding and underlining. Stem 1 is underlined once. Stem 2 is underlined twice.

<sup>c</sup>Restriction enzyme sites present in 5' and 3' HHRz for cloning purposes are bolded.

<sup>d</sup>Sites for HHRz modification to "active" or "inactive" forms are bolded and italicized.

<sup>e</sup>Full sequence of a representative empty cassette construct with center merged cloning site (GAATTC).
