# Supplementary material
Source: PubMed Central journal article supplement (PMC3519987)
Supplement: mt2012158x7.pdf [file mt2012158x7.pdf]

**Table S2.** Oligonucleotide and primer sequences used for engineering and cloning of the modified aptamer expression cassettes, RNA FISH, and qRT-PCR.

| Name                                                                                                 | Sequence                                                                    |
|------------------------------------------------------------------------------------------------------|-----------------------------------------------------------------------------|
| PT7_20ggg                                                                                            | GCATAATACGACTCACTATAGGG                                                     |
| Oligo1 <sup>a,b</sup>                                                                                | GCATAATACGACTCACTATAGGG <b>GCTAGCG</b> GATTAAACAAG                          |
| Oligo2a                                                                                              | GCGTTTCGTCGCATCCCAGCGACTCATCAGCTTGTTAATCCGCTAGCCC                           |
| Oligo2b                                                                                              | GCGTTTCGTCGCATCCCAGCGACTCATTTCCCTTGTTAATCCGCTAGCCC                          |
| Oligo3 <sup>b</sup>                                                                                  | GCTGGGATGCGACGAAACGCCTTCGGGCGTCCTTGATCT <b>GAATTC</b> CCTACGAACCC           |
| Oligo4 <sup>b</sup>                                                                                  | GACAG <b>GGATCC</b> GTTTTCCAGTGTTCCTTTATCTCCTGGGTTTCGTAGGG <b>GAATTC</b> AG |
| Oligo5 <sup>b</sup>                                                                                  | GGAAAACACTGGAAAAC <b>GGATCC</b> TGTCACGGATTGTGCTTATCCGT                     |
| Oligo6a <sup>b</sup>                                                                                 | GGAG <b>GGCGCCGCT</b> GTTTCGTCTCACGGACTCATCAGACGGATAAGCACAATCCGTGAC         |
| Oligo6b <sup>b</sup>                                                                                 | GGAG <b>GGCGCCGCT</b> GTTTCGTCTCACGGACTCATTTACGGATAAGCACAATCCGTGAC          |
| Reverse <sup>a</sup>                                                                                 | TTTTATTAGGAAAGGACAGTGGGAGGCGCCGCTGTTTCGTCTCTC                               |
| Cy3-70N                                                                                              | /5Cy3/CCCTTTTCGCTTAGTATGTGTTCT                                              |
| Cy3-U6                                                                                               | /5Cy3/CACGAATTTGCGTGCATCCTTGCGCAGGGCC                                       |
| Cy3-7SL                                                                                              | /5Cy3/CCGGGAGGTCACCATATTGATGCCGAACCTAGTGCG                                  |
| GAPDH-F                                                                                              | AGAAGGCTGGGGCTCATTG                                                         |
| GAPDH-R                                                                                              | <b>AGGGGCCATCCACAGTCTTC</b>                                                 |
| GAPDH-F                                                                                              | GGTGAAGGTCGGAGTCAACG                                                        |
| GAPDH-R                                                                                              | GTTGAGGTCAATGAAGGGGTC                                                       |
| U6-F                                                                                                 | CGCTTCGGCAGCACATATAC                                                        |
| U6-R                                                                                                 | TTCACGAATTTGCGTGCAT                                                         |
| 18S-F                                                                                                | CAGCCACCCGAGATTGAGCA                                                        |
| 18S-R                                                                                                | TAGTAGCGACGGGCGGTGTG                                                        |
| HIV Gag-F                                                                                            | TGCTATGTCAGTTCCCCTTGTTCTCT                                                  |
| HIV Gag-R                                                                                            | AGTTGGAGGACATCAAGCAGCCATGCAAAT                                              |
| 70NECO-F <sup>a, b</sup>                                                                             | ATCTAG <b>GAATTC</b> GGGAAAAGCGAATC                                         |
| 70NBAM-R <sup>a, b</sup>                                                                             | CTAGAT <b>GGATCC</b> TATGGAATTAAATA                                         |
| 80NECO-F <sup>a, b</sup>                                                                             | ATCTAG <b>GAATTC</b> GGGCATAAGGTATT                                         |
| 80NBAM-R <sup>a, b</sup>                                                                             | ACAGCG <b>GGATCC</b> CAGGTTGAGCTA                                           |
| 70N-F                                                                                                | GGGAAAAGCGAATCATACACAAGA                                                    |
| 70N-R                                                                                                | TATGGAATTAATACTTATGCCC                                                      |
| 80N-F                                                                                                | GGGCATAAGGTATTTAATTCCATA                                                    |
| 80N-R                                                                                                | CAGGTTGAGCTACCGGAGCATCCG                                                    |
| <sup>a</sup> Primers used for amplification of inserts for cloning into aptamer expression cassettes |                                                                             |
| <sup>b</sup> Restriction enzyme sites are denoted with bolding                                       |                                                                             |
