# Supplementary material
Source: PubMed Central journal article supplement (PMC3519987)
Supplement: mt2012158x8.pdf [file mt2012158x8.pdf]

**Table S3.** Expected cleavage products for mcHHRz and eHHRz cassettes.

|            |                 | <b>Full Length</b> | <b>5' Cleavage</b> |     | <b>Aptamer Fragment</b> | <b>3' Cleavage</b> |    |
|------------|-----------------|--------------------|--------------------|-----|-------------------------|--------------------|----|
| <b>70N</b> | <b>mcHHRz</b>   | 276                | 53                 | 223 | 141                     | 194                | 82 |
|            | <b>Active</b>   | 274                | 59                 | 215 | 140                     | 199                | 75 |
|            | <b>5'Active</b> | 274                | 59                 | 215 | -                       | -                  | -  |
|            | <b>3'Active</b> | 274                | -                  | -   | -                       | 199                | 75 |
|            | <b>Inactive</b> | 274                | -                  | -   | -                       | -                  | -  |
| <b>80N</b> | <b>mcHHRz</b>   | 294                | 53                 | 241 | 159                     | 212                | 82 |
|            | <b>Active</b>   | 292                | 59                 | 233 | 158                     | 217                | 75 |
|            | <b>5'Active</b> | 292                | 59                 | 233 | -                       | -                  | -  |
|            | <b>3'Active</b> | 292                | -                  | -   | -                       | 217                | 75 |
|            | <b>Inactive</b> | 292                | -                  | -   | -                       | -                  | -  |
