# Supplementary material
Source: PubMed Central journal article supplement (PMC3519987)

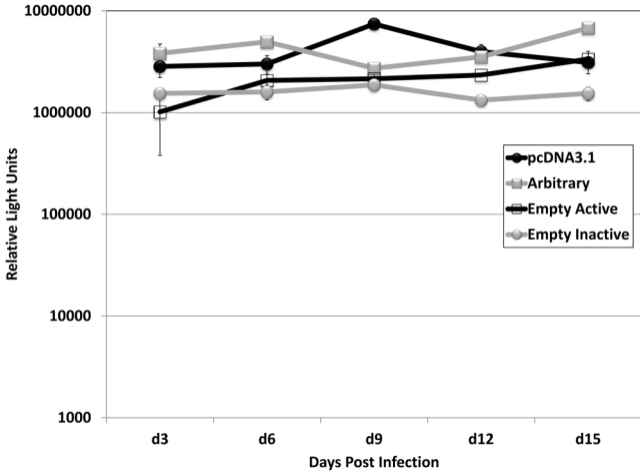

Supplement: mt2012158x2.pdf [file mt2012158x2.pdf]

**a.**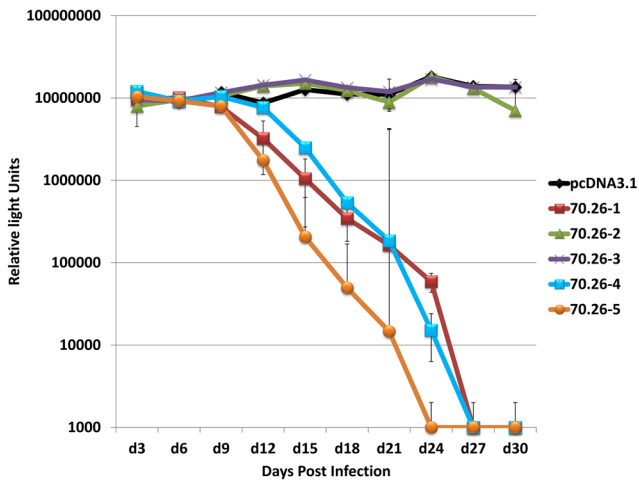**b.**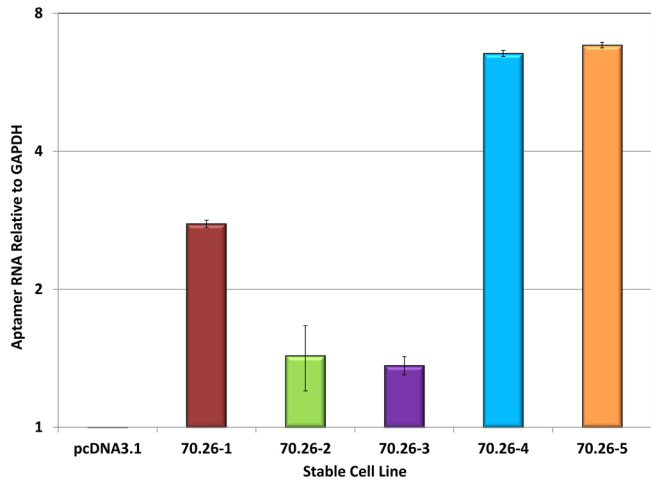

Supplement: mt2012158x3.pdf [file mt2012158x3.pdf]

**a.**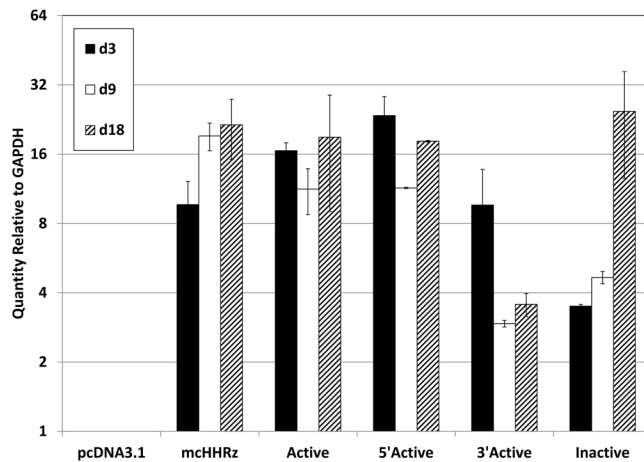**b.**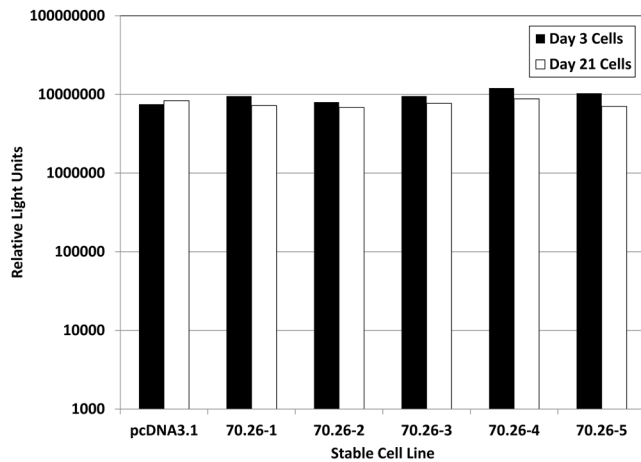**c.**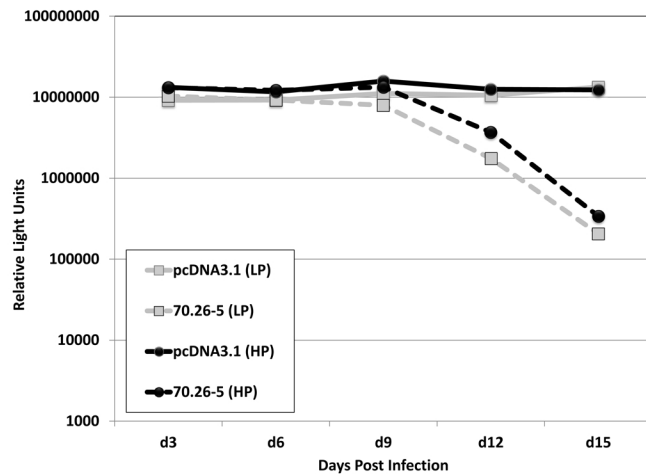

Supplement: mt2012158x4.pdf [file mt2012158x4.pdf]

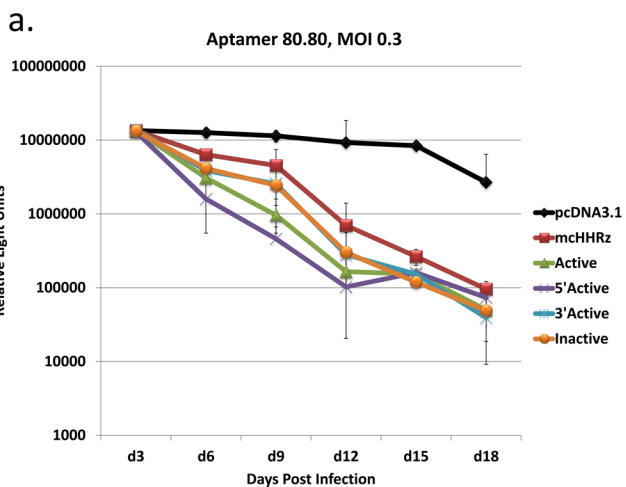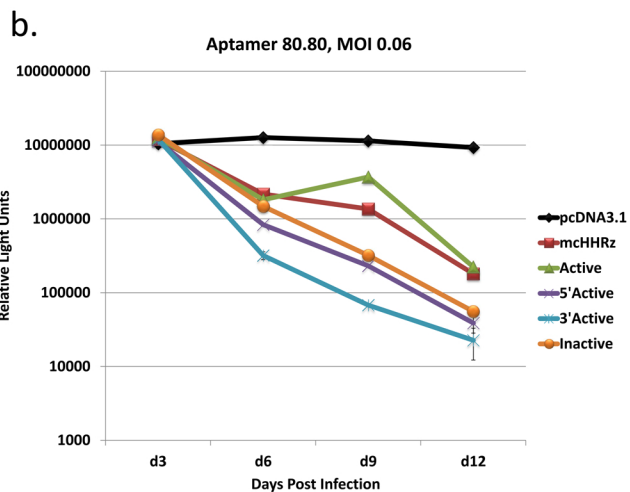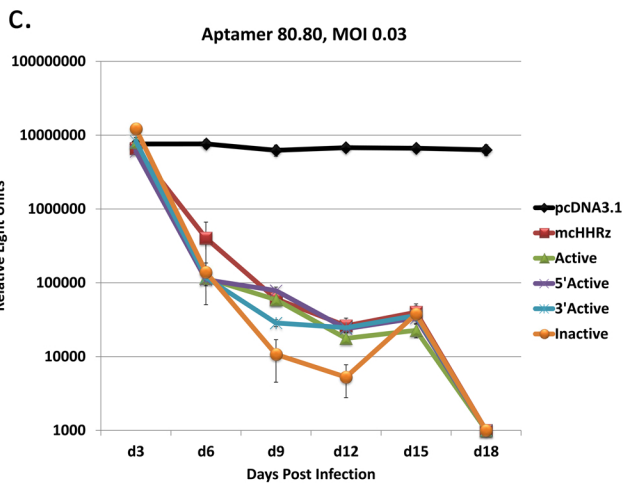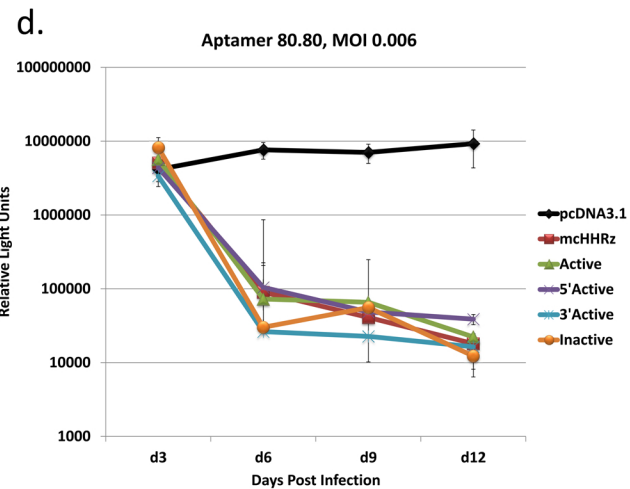

Supplement: mt2012158x5.pdf [file mt2012158x5.pdf]
